# Supplementary material for: Gnetin C Intercepts MTA1-Associated Neoplastic Progression in Prostate Cancer
Source: MDPI journal article supplement (doi:10.3390/cancers14246038), 2022-12-08
Supplement: s1 [file s1]

Supplementary Information:

“MTA1-mediated efficacy of Gnetin C-supplemented diet in transgenic mouse model of prostate cancer”

Prashanth Parupathi, Gisella Campanelli, Rabab Al Deabel, Anand Puaar, Lakshmi Sirisha Devarakonda, Avinash Kumar, and Anait S Levenson

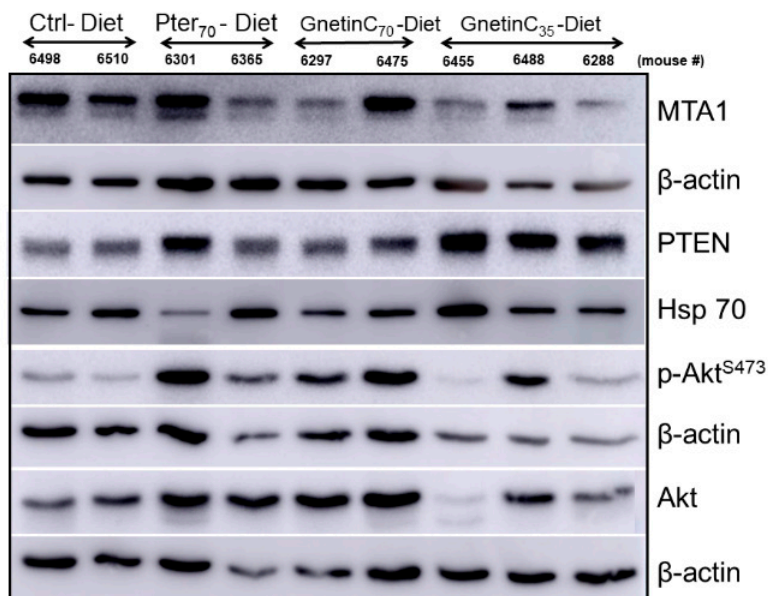

**Figure S1.** Screening of prostate tissues for molecular markers from mice fed different diets. Gnetin C<sub>35</sub>-Diet treated mice consistently showed inhibition of MTA1 and associated p-Akt/Akt and upregulation of PTEN. Other treatment groups demonstrated more heterogeneity in response to compounds, when compared to Ctrl mice. Western blot was performed as described in *Material and Methods*.

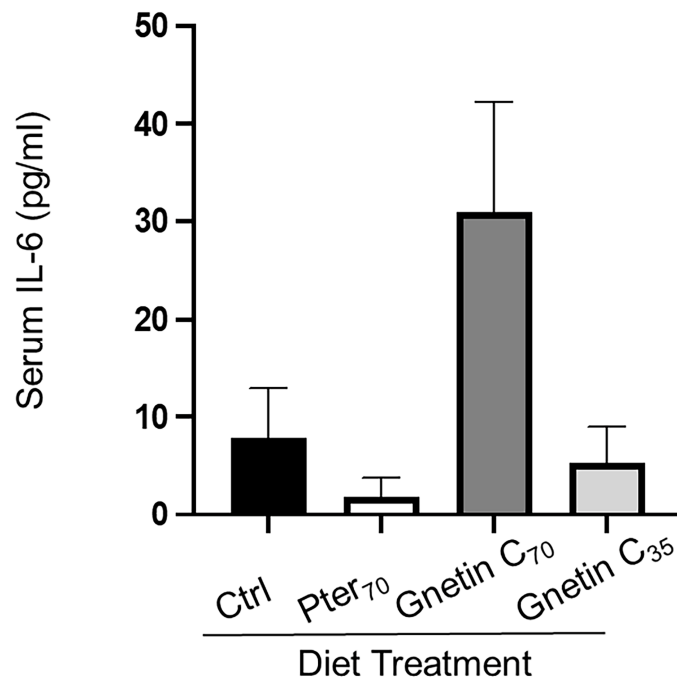

**Figure S2.** Effects of diets supplemented with Gnetin C on the levels of circulating inflammatory IL-6 cytokine detected in murine serum by ELISA. Circulating levels of IL-6 in sera collected from precancerous *R26<sup>MTA1</sup>; Pten<sup>f/+</sup>; Cre<sup>+</sup>* mice on different diets (n = 2 per group). Data represents the mean  $\pm$  SEM of two independent experiments performed in duplicates.  $p = 0.075$ , ns between groups (one-way ANOVA).

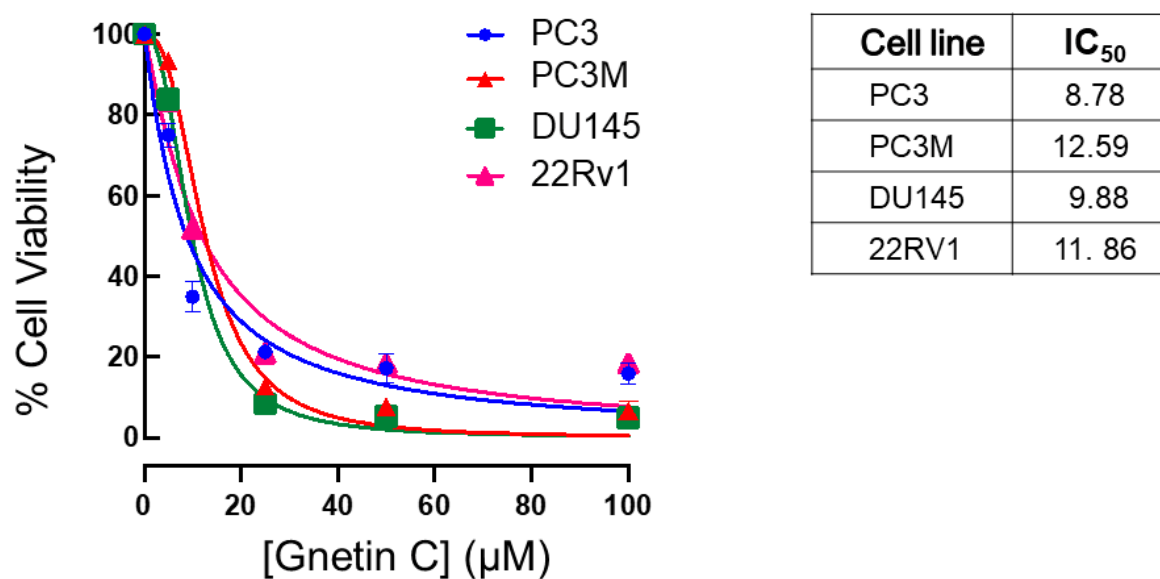

**Figure S3.** Gnetin C inhibits proliferation of prostate cancer cells in a dose-dependent manner. MTT cell viability assay was performed using PC3, PC3M, DU145, and 221Rv1 prostate cancer cell lines as described earlier [25, 29, 30, 34]. IC<sub>50</sub> was calculated using GraphPad Prism v9 software.
